# Supplementary material for: Genome-Wide Association Study of Bone Mineral Density in Korean Men
Source: PubMed Central journal article supplement — Genomics Inform. 2016 Jun 30;14(2):62–8. doi: 10.5808/GI.2016.14.2.62 (PMC4951402; doi:10.5808/gi.2016.14.2.62), 2016-06-30
Supplement: gni-14-62-s002.pdf [file gni-14-62-s002.pdf]

## SUPPLEMENTARY INFORMATION

### Genome-Wide Association Study of Bone Mineral Density in Korean Men

**Ye Seul Bae<sup>1†</sup>, Sun-Wha Im<sup>2†</sup>, Mi So Kang<sup>1</sup>, Jin Hee Kim<sup>1</sup>, Soon Hang Lee<sup>1,3</sup>,  
Be Long Cho<sup>1</sup>, Jin Ho Park<sup>1</sup>, You-Seon Nam<sup>1</sup>, Ho-Young Son<sup>3</sup>, San Deok Yang<sup>3</sup>,  
Joon Sung<sup>4</sup>, Kwang Ho Oh<sup>1</sup>, Jae Moon Yun<sup>1\*</sup>, Jong Il Kim<sup>3\*\*</sup>**

<sup>1</sup>Department of Family Medicine, Seoul National University Hospital, Seoul National University College of Medicine, Seoul 03080, Korea,

<sup>2</sup>Neuro-Immune Information Storage Network Research Center, Seoul National University College of Medicine, Seoul 03080, Korea,

<sup>3</sup>Department of Biochemistry and Molecular Biology, Seoul National University College of Medicine, Seoul 03080, Korea,

<sup>4</sup>Department of Epidemiology, Seoul National University School of Public Health/Institute of Health and Environment, Seoul National University 08826, Seoul, Korea

(A)

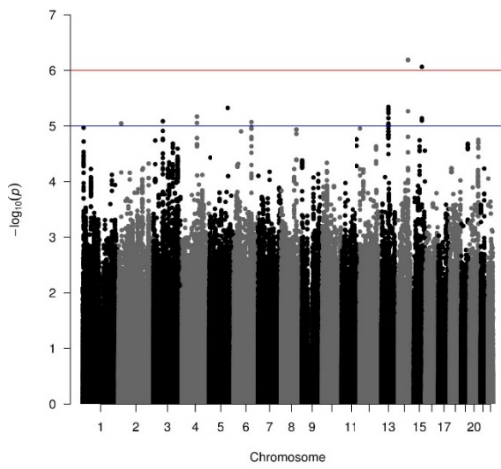

(B)

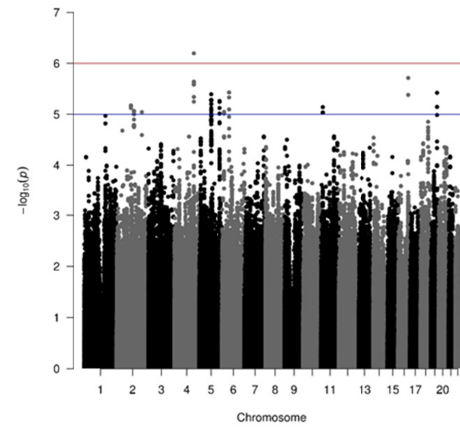

**Supplementary Fig. 2.** Manhattan plots. (A) Manhattan plot of bone mineral density (BMD) at the lumbar spine. (B) Manhattan plot of BMD at femur total.
